# Supplementary material for: A Matheuristic for the Multivehicle Inventory Routing Problem
Source: Atypon-hosted journal article supplement (doi:10.1287/ijoc.2016.0737), 2017-05-11
Supplement: ijoc.2016.0737-sm.pdf [file ijoc.2016.0737-sm.pdf]

Online Supplement for “A matheuristic for the  
multi-vehicle inventory routing problem”

Claudia Archetti <sup>(1)</sup>      Natasha Boland <sup>(2)</sup>

M. Grazia Speranza <sup>(1)</sup>

*<sup>(1)</sup>Department of Economics and Management*

*University of Brescia, Italy*

*{claudia.archetti, grazia.speranza}@unibs.it*

*<sup>(2)</sup>School of Industrial and Systems Engineering*

*Georgia Institute of Technology, USA*

*natashia.boland@isye.gatech.edu*

October 7, 2016

## Computational results

Table 1: Computational results on small instances: comparison with the branch-and-cut algorithm [1]

| low inv. cost |                 |                   |             |                  |                 |               |             |
|---------------|-----------------|-------------------|-------------|------------------|-----------------|---------------|-------------|
|               | # opt. found    | % gap w.r.t. opt. |             | # better than UB | % gap w.r.t. UB |               |             |
|               |                 | av.               | max         |                  | av.             | min           | max         |
| $H = 3$       | 62 (126)        | 0.23              | 5.01        | 51 (74)          | -6.04           | -29.17        | 6.26        |
| $H = 6$       | 14 (38)         | 0.25              | 2.32        | 29 (82)          | -0.72           | -33.01        | 5.54        |
| $m = 2$       | 22 (69)         | 0.20              | 2.01        | 2 (11)           | 0.24            | -1.30         | 1.52        |
| $m = 3$       | 29 (46)         | 0.31              | 5.01        | 17 (34)          | -1.54           | -12.84        | 5.96        |
| $m = 4$       | 14 (27)         | 0.13              | 1.75        | 30 (53)          | -3.00           | -21.95        | 5.54        |
| $m = 5$       | 11 (22)         | 0.30              | 1.71        | 31 (58)          | -5.52           | -33.01        | 6.26        |
| <b>All</b>    | <b>76 (164)</b> | <b>0.23</b>       | <b>5.01</b> | <b>80 (156)</b>  | <b>-3.23</b>    | <b>-33.01</b> | <b>6.26</b> |

  

| high inv. cost |                 |                   |             |                  |                 |               |             |
|----------------|-----------------|-------------------|-------------|------------------|-----------------|---------------|-------------|
|                | # opt. found    | % gap w.r.t. opt. |             | # better than UB | % gap w.r.t. UB |               |             |
|                |                 | av.               | max         |                  | av.             | min           | max         |
| $H = 3$        | 52 (126)        | 0.16              | 2.78        | 56 (74)          | -3.25           | -11.97        | 4.14        |
| $H = 6$        | 14 (42)         | 0.20              | 1.50        | 19 (78)          | 0.20            | -7.19         | 5.25        |
| $m = 2$        | 17 (73)         | 0.16              | 2.78        | 0 (7)            | 0.43            | 0.00          | 1.08        |
| $m = 3$        | 23 (45)         | 0.16              | 2.02        | 17 (35)          | -0.27           | -5.35         | 3.25        |
| $m = 4$        | 13 (27)         | 0.17              | 1.58        | 28 (53)          | -1.67           | -11.50        | 2.88        |
| $m = 5$        | 13 (23)         | 0.24              | 1.50        | 30 (57)          | -2.87           | -11.97        | 5.25        |
| <b>All</b>     | <b>66 (168)</b> | <b>0.17</b>       | <b>2.78</b> | <b>75 (152)</b>  | <b>-1.59</b>    | <b>-11.97</b> | <b>5.25</b> |

Table 2: Computational results on small instances: comparison with the branch-price-and-cut algorithm [2]

| low inv. cost  |              |                   |      |                  |                 |        |      |
|----------------|--------------|-------------------|------|------------------|-----------------|--------|------|
|                | # opt. found | % gap w.r.t. opt. |      | # better than UB | % gap w.r.t. UB |        |      |
|                |              | av.               | max  |                  | av.             | min    | max  |
| $H = 3$        | 56 (121)     | 0.81              | 7.18 | 41 (79)          | -16.33          | -49.56 | 9.58 |
| $H = 6$        | 13 (30)      | 0.46              | 3.39 | 76 (90)          | -34.59          | -52.79 | 4.98 |
| $m = 2$        | 18 (37)      | 0.00              | 0.00 | 36 (43)          | -31.93          | -49.95 | 2.01 |
| $m = 3$        | 26 (35)      | 0.03              | 0.68 | 30 (45)          | -25.34          | -52.79 | 4.76 |
| $m = 4$        | 13 (40)      | 1.25              | 6.66 | 28 (40)          | -24.60          | -49.90 | 4.89 |
| $m = 5$        | 12 (39)      | 1.55              | 7.18 | 23 (41)          | -21.62          | -46.86 | 9.58 |
| <b>All</b>     | 69 (151)     | 0.74              | 7.18 | 117 (169)        | -26.24          | -52.79 | 9.58 |
| high inv. cost |              |                   |      |                  |                 |        |      |
|                | # opt. found | % gap w.r.t. opt. |      | # better than UB | % gap w.r.t. UB |        |      |
|                |              | av.               | max  |                  | av.             | min    | max  |
| $H = 3$        | 46 (133)     | 0.42              | 5.81 | 45 (67)          | -13.51          | -34.25 | 2.09 |
| $H = 6$        | 12 (33)      | 0.52              | 4.28 | 66 (87)          | -22.15          | -37.20 | 4.21 |
| $m = 2$        | 11 (38)      | 0.01              | 0.07 | 37 (42)          | -17.42          | -33.58 | 0.65 |
| $m = 3$        | 21 (42)      | 0.10              | 0.91 | 26 (38)          | -16.63          | -37.09 | 2.09 |
| $m = 4$        | 13 (41)      | 0.56              | 2.92 | 30 (39)          | -19.78          | -37.20 | 2.63 |
| $m = 5$        | 13 (45)      | 1.01              | 5.81 | 18 (35)          | -19.62          | -33.44 | 4.21 |
| <b>All</b>     | 58 (166)     | 0.44              | 5.81 | 111 (154)        | -18.18          | -37.20 | 4.21 |

## References

- [1] L. C. Coelho and G. Laporte. Improved solutions for inventory-routing problems through valid inequalities and input ordering. *International Journal of Production Economics*, 155:391–397, 2014.
- [2] G. Desaulniers, J. Rakke, and L. C. Coelho. A branch-price-and-cut algorithm for the inventory-routing problem. *Transportation Science*, 2015.
